# Supplementary material
Source: MDPI journal article supplement (https://www.mdpi.com/2076-3271/5/4/22)
Supplement: s1 [file s1]

| Gene  | Variant           | Frequency |
|-------|-------------------|-----------|
| CASQ2 | c.196 A>G         | 1         |
|       | c.420+6 T>C       | 3         |
|       | c.784-17 T>A      | 2         |
|       | c.1185 C>T        | 3         |
|       | c.1194T>C         | 1         |
| DSC2  | c.111A>G          | 1         |
|       | c.942+12_13insTTA | 3         |
|       | c.2393G>A         | 2         |
| DSG2  | c.828+16C>A       | 3         |
|       | c.861C>T          | 3         |
|       | c.877A>G          | 1         |
|       | c.2137G>A         | 3         |
|       | c.2318G>A         | 1         |
|       | c.2505A>G         | 1         |
|       | c.3321T>C         | 3         |
| DSP   | c.1dupA           | 2         |
|       | c.126T>C          | 1         |
|       | c.741T>G          | 2         |
|       | c.2091A>G         | 5         |
|       | c.2631G>A         | 5         |
|       | c.2862C>T         | 2         |
|       | c.4117A>G         | 1         |
|       | c.5213G>A         | 1         |
|       | c.7122C>T         | 4         |
|       | c.8175C>A         | 1         |
|       | c.8472G>C         | 5         |
| GLA   | c.-10C>T          | 1         |
|       | c.640-16A>G       | 1         |
| KCNE1 | c.84G>A           | 1         |
|       | c.112A>G          | 34        |
|       | c.253G>A          | 1         |
| KCNH2 | c.125T>A          | 1         |
|       | c.221_242del      | 1         |
|       | c.456dupC         | 1         |
|       | c.571insCTGCTG    | 1         |
|       | c.1467C>T         | 19        |
|       | c.1504A>C         | 1         |
|       | c.1539C>T         | 19        |
|       | c.1682C>T         | 12        |
|       | c.1692A>G         | 31        |
|       | c.1843C>G         | 1         |
|       | c.1872_1882dup    | 1         |
|       | c.1956T>C         | 34        |
|       | c.2230C>T         | 1         |
|       | c.2246delG        | 1         |
|       | c.2690A>C         | 4         |
|       | c.2886delG        | 1         |
|       | c.3093_3106del    | 1         |
| KCNJ2 | c.244C>T          | 1         |
|       | c.935G>A          | 1         |
|       | c.1146C>T         | 3         |
|       | c.1229A>G         | 1         |

|               |                              |    |
|---------------|------------------------------|----|
| <i>KCNQ1</i>  | c.477+5G>A                   | 1  |
|               | c.478-10G>A                  | 1  |
|               | c.567delG                    | 1  |
|               | c.572_576del                 | 1  |
|               | c.727C>T                     | 1  |
|               | c.733_734del                 | 1  |
|               | c.797T>C                     | 1  |
|               | c.805G>A                     | 1  |
|               | c.998_999delCT               | 1  |
|               | c.1024C>T                    | 1  |
|               | c.1033-2A>G                  | 1  |
|               | c.1066C>T                    | 1  |
|               | c.1090_1095dup               | 1  |
|               | c.1349-1G>T                  | 1  |
|               | c.1394-14C>T                 | 2  |
|               | c.1590+14T>C                 | 1  |
|               | c.1638G>A                    | 18 |
|               | c.1986C>T                    | 7  |
| <i>LMNA</i>   | c.175C>A                     | 1  |
|               | c.1017G>A                    | 1  |
|               | c.1046G>A                    | 1  |
|               | c.1304_1307delGCAC           | 2  |
|               | c.1698C>T                    | 5  |
| <i>MYBPC3</i> | c.158_160delACAAinsTGGTCACAG | 1  |
|               | c.472G>A                     | 6  |
|               | c.492C>T                     | 1  |
|               | c.506-12delG                 | 23 |
|               | c.537C>T                     | 1  |
|               | c.596T>G                     | 1  |
|               | c.649A>G                     | 1  |
|               | c.706A>G                     | 14 |
|               | c.786C>T                     | 13 |
|               | c.1286C>T                    | 1  |
|               | c.1484G>A                    | 1  |
|               | c.1624G>C                    | 1  |
|               | c.1624+4A>T                  | 1  |
|               | c.1855G>A                    | 1  |
|               | c.2308+18C>G                 | 1  |
|               | c.2373dupG                   | 2  |
|               | c.2547C>T                    | 1  |
|               | c.2737+12C>T                 | 1  |
|               | c.2827C>T                    | 1  |
|               | c.2864_2865delCT             | 1  |
|               | c.3617delG                   | 1  |
|               | c.3288G>A                    | 25 |
| <i>MYH7</i>   | c.77C>T                      | 1  |
|               | c.189T>C                     | 29 |
|               | c.732C>T                     | 18 |
|               | c.597A>G                     | 2  |
|               | c.895+17G>A                  | 1  |
|               | c.925G>A                     | 1  |
|               | c.975C>T                     | 1  |
|               | c.1062C>T                    | 4  |

|       |                 |    |
|-------|-----------------|----|
|       | c.1063G>T       | 1  |
|       | c.1095G>A       | 15 |
|       | c.1128C>T       | 15 |
|       | c.2360G>A       | 1  |
|       | c.2389G>A       | 1  |
|       | c.2681A>G       | 11 |
|       | c.2967T>C       | 25 |
|       | c.3064A>G       | 1  |
|       | c.3337-2_3insC  | 2  |
|       | c.4472C>G       | 1  |
|       | c.5106G>A       | 12 |
|       | c.5172C>G       | 1  |
| MYL2  | c.132T>C        | 2  |
|       | c.353+20delC    | 3  |
|       | c.485_487delGAG | 1  |
| PKP2  | c.209G>T        | 1  |
|       | c.419C>T        | 1  |
|       | c.1097T>C       | 1  |
|       | c.1759G>A       | 1  |
|       | c.2058T>A       | 1  |
| RYR2  | c.464-8A>C      | 3  |
|       | c.677-11T>A     | 4  |
|       | c.1259G>A       | 1  |
|       | c.1359C>T       | 4  |
|       | c.1612+14T>C    | 3  |
|       | c.1847C>T       | 1  |
|       | c.2973A>G       | 4  |
|       | c.6737C>T       | 1  |
|       | c.6906T>C       | 4  |
|       | c.7806C>T       | 3  |
|       | c.8873A>G       | 2  |
|       | c.9318T>G       | 4  |
|       | c.10503C>T      | 4  |
|       | c.10776C>T      | 4  |
|       | c.10935+18C>T   | 4  |
|       | c.11963-11T>C   | 1  |
|       | c.13476+16A>G   | 2  |
|       | c.13783-6A>G    | 4  |
|       | c.13913+12A>C   | 4  |
| SCN1B | c.40+15G>T      | 2  |
|       | c.629T>C        | 2  |
| SCN5A | c.87A>G         | 41 |
|       | c.612-2A>G      | 1  |
|       | c.1141-3C>A     | 22 |
|       | c.1673A>G       | 26 |
|       | c.2436+12G>A    | 12 |
|       | c.2788-6C>T     | 4  |
|       | c.3032C>T       | 1  |
|       | c.3183A>G       | 44 |
|       | c.3269C>T       | 1  |
|       | c.3308C>A       | 1  |
|       | c.3510+10C>T    | 1  |
|       | c.3572G>A       | 1  |

|              |                   |    |
|--------------|-------------------|----|
|              | c.3578G>A         | 6  |
|              | c.4218G>A         | 1  |
|              | c.4231delG        | 1  |
|              | c.4848C>T         | 1  |
|              | c.5350G>A         | 1  |
|              | c.5385_5387dupTGA | 1  |
|              | c.5457T>C         | 21 |
| <i>TNNI3</i> | c.25-8T>A         | 20 |
|              | c.109-17C>A       | 2  |
|              | c.204G>T          | 1  |
|              | c.373-10T>G       | 35 |
|              | 537G>A            | 14 |
| <i>TNNT2</i> | c.52+7G>A         | 1  |
|              | c.53-7_11delCTTCT | 32 |
|              | c.113C>T          | 1  |
|              | c.144C>T          | 1  |
|              | c.237G>A          | 2  |
|              | c.311G>T          | 1  |
|              | c.348C>T          | 33 |
|              | c.418C>T          | 1  |
|              | c.517_519delGAG   | 1  |
|              | c.601-1G>A        | 1  |
|              | c.779A>G          | 1  |
| <i>TPM1</i>  | c.453C>A          | 32 |
|              | c.486T>C          | 11 |
|              | c.574G>A          | 1  |
|              | c.688G>A          | 1  |
| <i>TTN</i>   | c.982C>T          | 1  |
|              | c.2244G>A         | 2  |
|              | c.2432C>T         | 5  |
|              | c.3087T>C         | 1  |
|              | c.3601A>G         | 7  |
|              | c.3759A>G         | 1  |
|              | c.38034T>C        | 1  |
|              | c.3884C>T         | 7  |
|              | c.4480+6C>T       | 7  |
|              | c.4715G>A         | 1  |
|              | c.5132C>T         | 1  |
|              | c.7545C>T         | 2  |
|              | c.7830G>C         | 1  |
|              | c.8492G>A         | 1  |
|              | c.8902+14T>A      | 1  |
|              | c.9597A>G         | 1  |
|              | c.9781G>A         | 7  |
|              | c.9879A>G         | 7  |
|              | c.10256G>A        | 7  |
|              | c.10793G>A        | 1  |
|              | c.10878C>T        | 7  |
|              | c.13811G>A        | 1  |
|              | c.14297-19G>C     | 1  |
|              | c.16086A>G        | 1  |
|              | c.18652G>C        | 1  |
|              | c.19367-3T>C      | 1  |

|               |   |
|---------------|---|
| c.19491G>A    | 7 |
| c.20699A>C    | 1 |
| c.20784C>T    | 2 |
| c.21241A>G    | 1 |
| c.21332C>A    | 2 |
| c.21542G>A    | 1 |
| c.21894G>T    | 1 |
| c.21975T>C    | 1 |
| c.22359A>T    | 2 |
| c.22557A>G    | 2 |
| c.22676A>G    | 1 |
| c.22923C>T    | 2 |
| c.24930G>A    | 1 |
| c.26031T>C    | 1 |
| c.26067G>A    | 1 |
| c.27079A>G    | 1 |
| c.27832A>G    | 2 |
| c.28132G>A    | 2 |
| c.28916G>A    | 1 |
| c.29075-10T>A | 1 |
| c.29555G>A    | 2 |
| c.30102G>A    | 1 |
| c.33804T>C    | 1 |
| c.34367A>G    | 1 |
| c.35254A>G    | 2 |
| c.35315T>C    | 1 |
| c.42110T>G    | 1 |
| c.42281A>C    | 1 |
| c.43980G>A    | 1 |
| c.45117T>C    | 1 |
| c.45419A>T    | 1 |
| c.46387A>G    | 1 |
| c.46485T>C    | 1 |
| c.48397A>G    | 2 |
| c.49611T>C    | 2 |
| c.50732G>A    | 1 |
| c.51229C>T    | 1 |
| c.51881C>T    | 1 |
| c.52434T>C    | 1 |
| c.53541A>G    | 2 |
| c.53791C>T    | 1 |
| c.54354T>C    | 2 |
| c.56504C>T    | 2 |
| c.56572C>T    | 1 |
| c.57871+19T>G | 1 |
| c.57978A>G    | 2 |
| c.58025T>C    | 1 |
| c.58910G>A    | 1 |
| c.59371G>A    | 1 |
| c.59395T>C    | 1 |
| c.59542G>C    | 7 |
| c.59931T>C    | 1 |
| c.59933-17T>C | 1 |

|               |   |
|---------------|---|
| c.63126C>T    | 2 |
| c.67135C>T    | 1 |
| c.69016T>C    | 1 |
| c.69575A>G    | 1 |
| c.69934A>G    | 1 |
| c.70970T>C    | 2 |
| c.71561T>C    | 1 |
| c.72158C>T    | 1 |
| c.73095C>A    | 1 |
| c.74151C>T    | 1 |
| c.75619A>G    | 2 |
| c.75969T>C    | 2 |
| c.79383T>C    | 1 |
| c.80483T>C    | 2 |
| c.84148+8T>A  | 1 |
| c.84487A>G    | 1 |
| c.85539C>T    | 1 |
| c.87343A>G    | 1 |
| c.89909G>A    | 1 |
| c.90091+6G>T  | 2 |
| c.90243G>C    | 1 |
| c.90394+9T>A  | 1 |
| c.90891A>G    | 1 |
| c.91327T>A    | 1 |
| c.91730G>A    | 1 |
| c.92392G>A    | 1 |
| c.93062-10T>C | 1 |
| c.94815C>T    | 1 |
| c.96077G>A    | 1 |
| c.97284C>T    | 1 |
| c.97680A>G    | 2 |
| c.98571G>C    | 1 |
| c.98854G>A    | 1 |

**Supplementary data 1: List of the variants tested.**

Variants highlighted in yellow make up the list of unique variants required to satisfy the ACGS guidelines.
