# Supplementary material
Source: MDPI journal article supplement (https://www.mdpi.com/2076-3271/5/4/22)
Supplement: s1 [file s1]

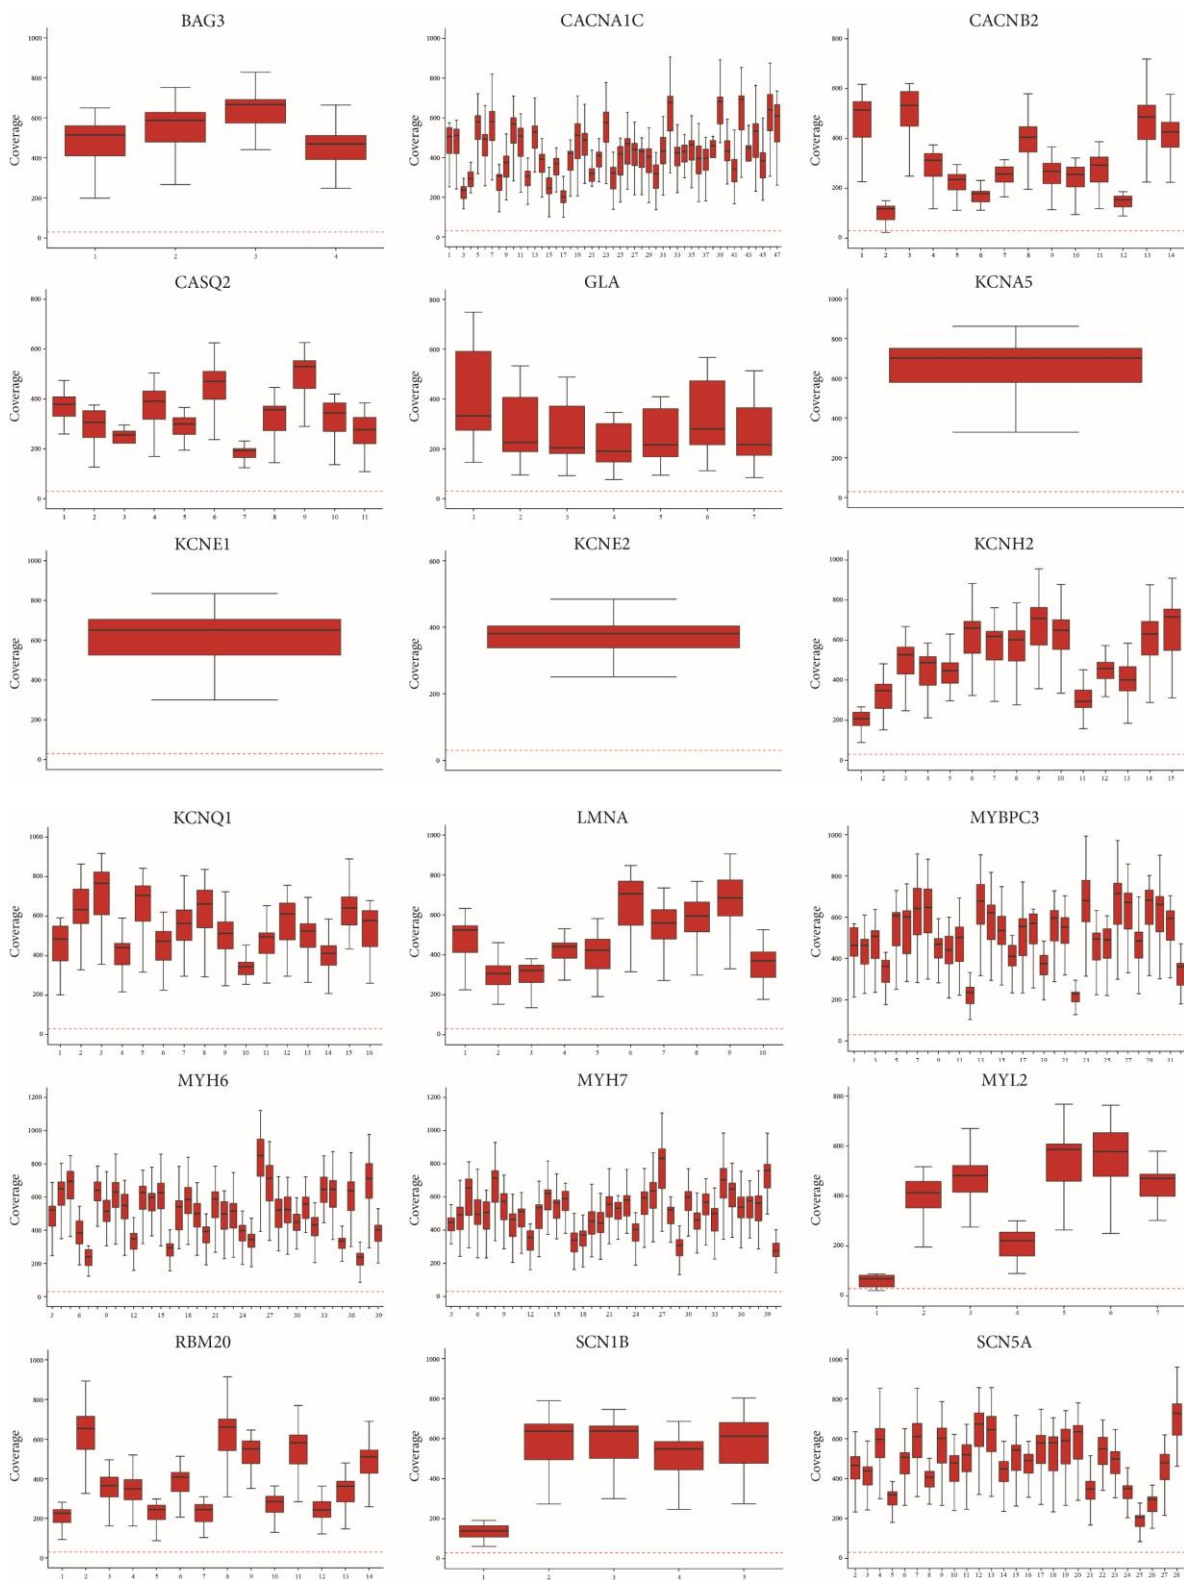

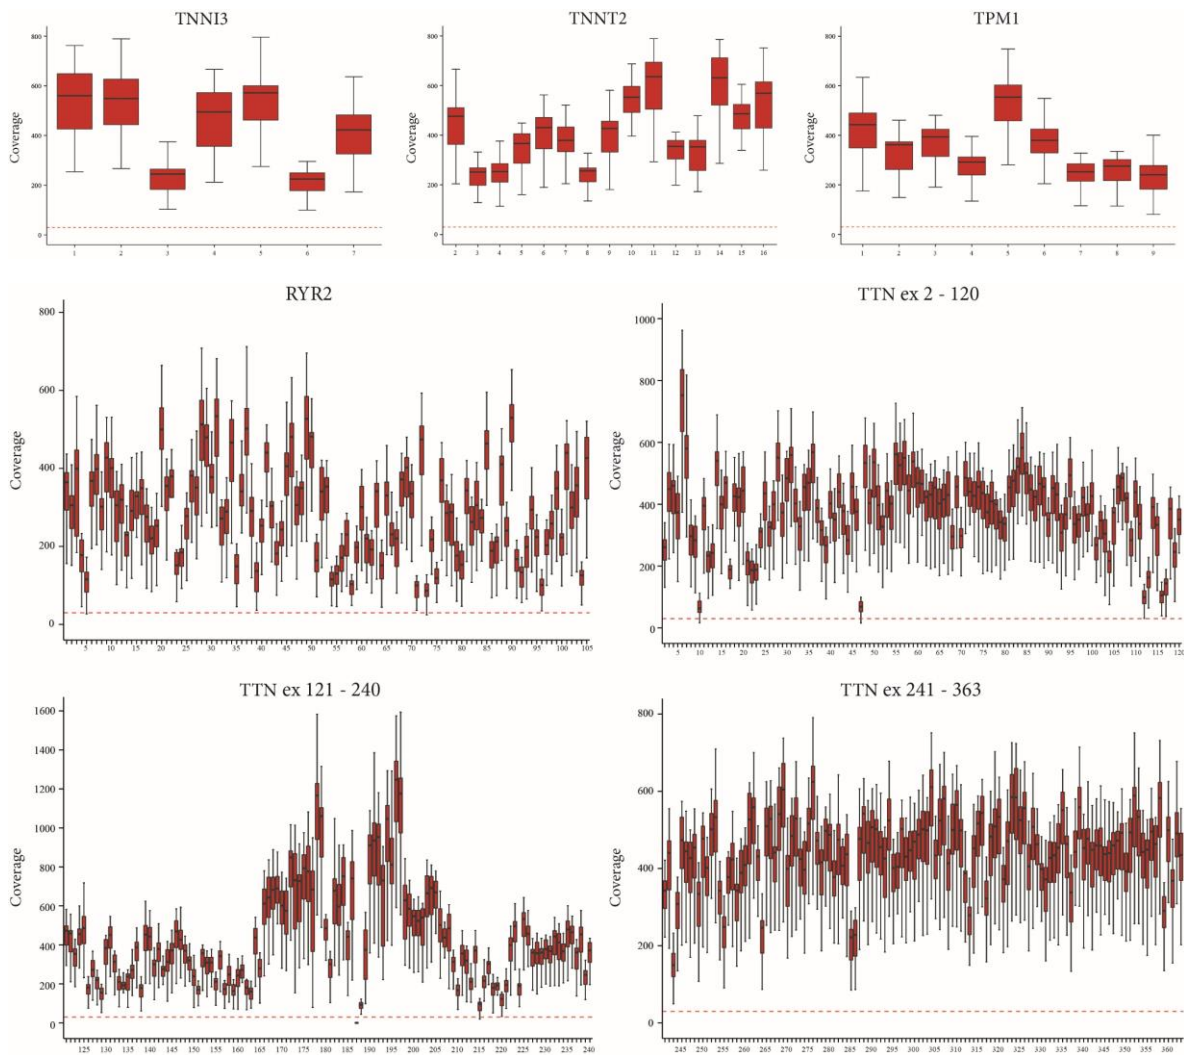

**Supplementary Figure S1:** Read-depth (coverage) of all exons for all genes from iteration one of the custom-cardiac panel. The dashed red line indicates the 30X read-depth threshold.

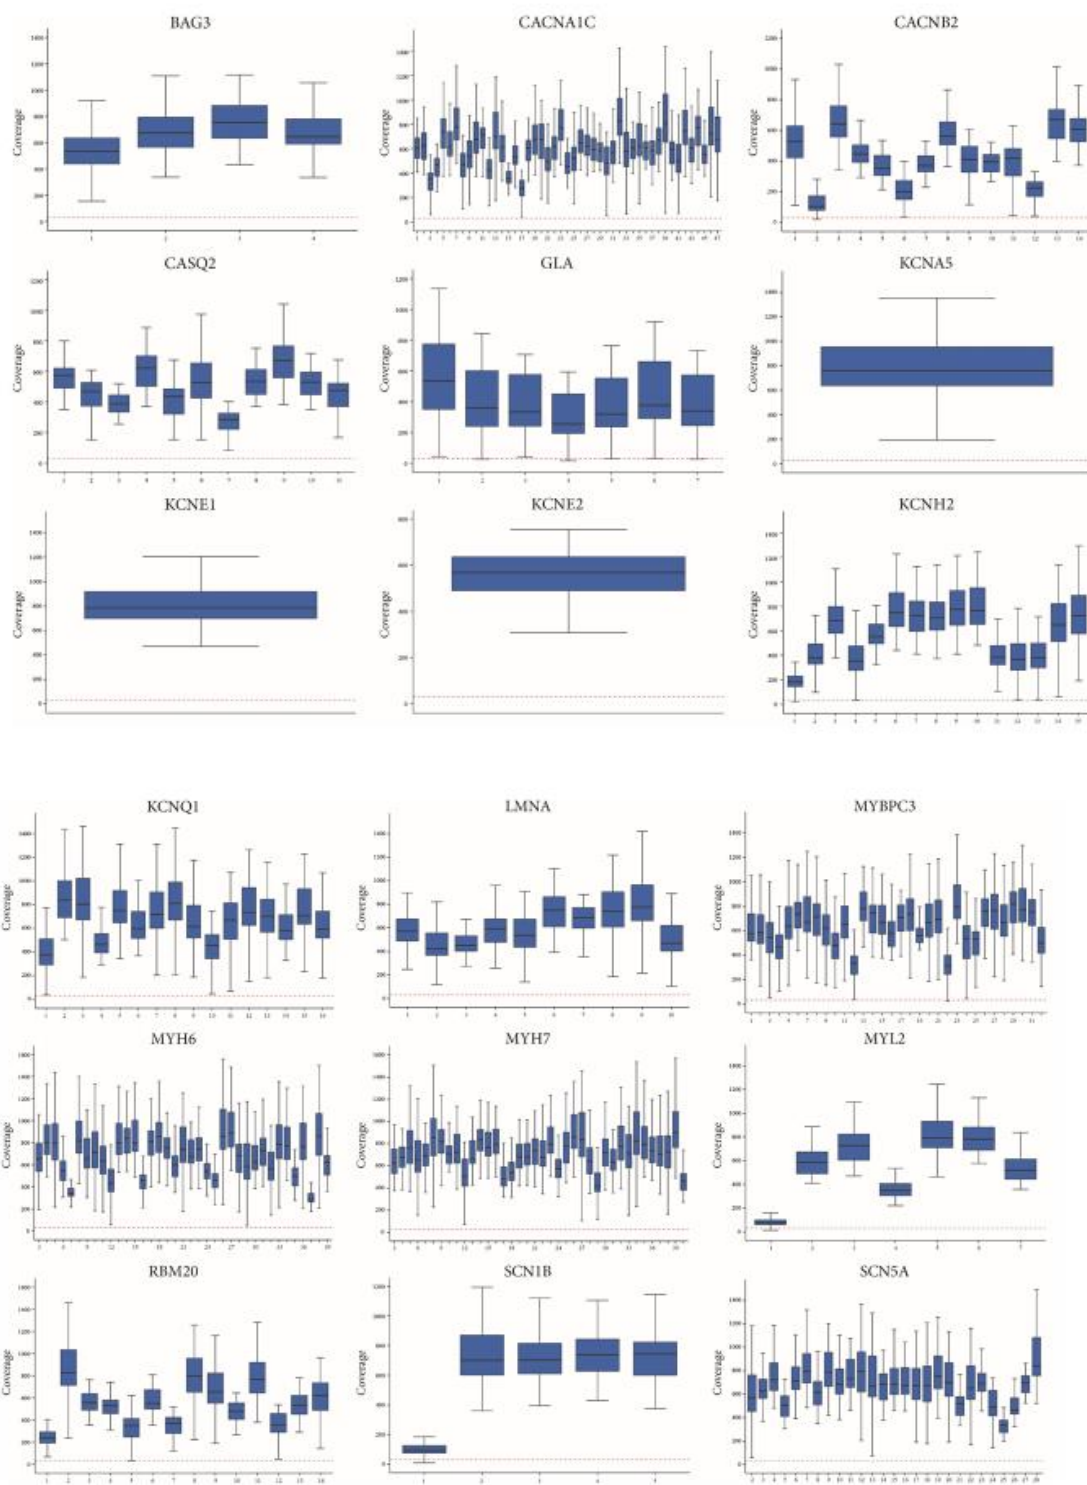

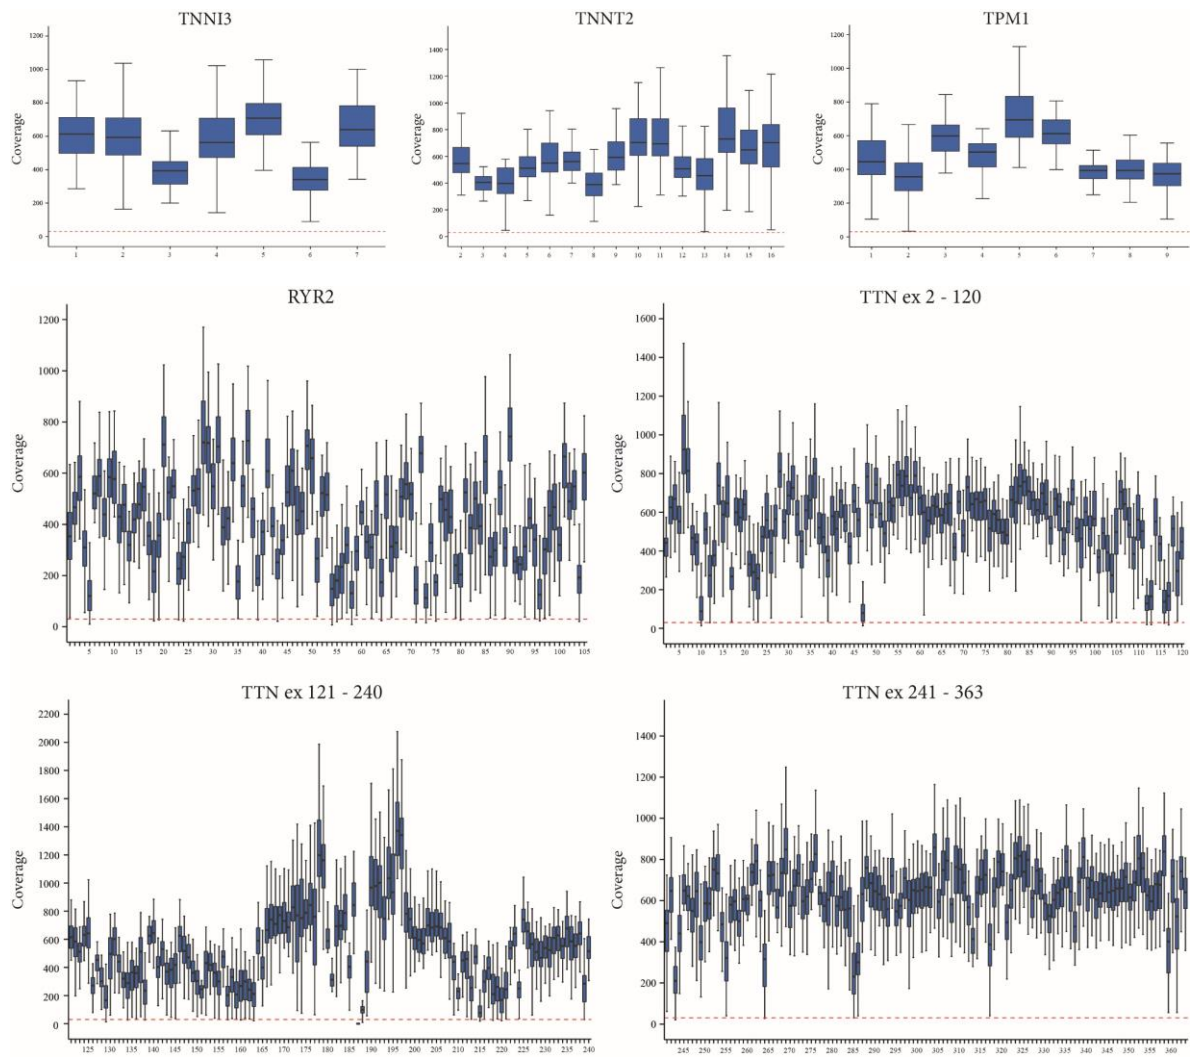

**Supplementary Figure S2:** Read-depth (coverage) of all exons for all genes from iteration two of the custom-cardiac panel. The dashed red line indicates the 30× read-depth threshold.



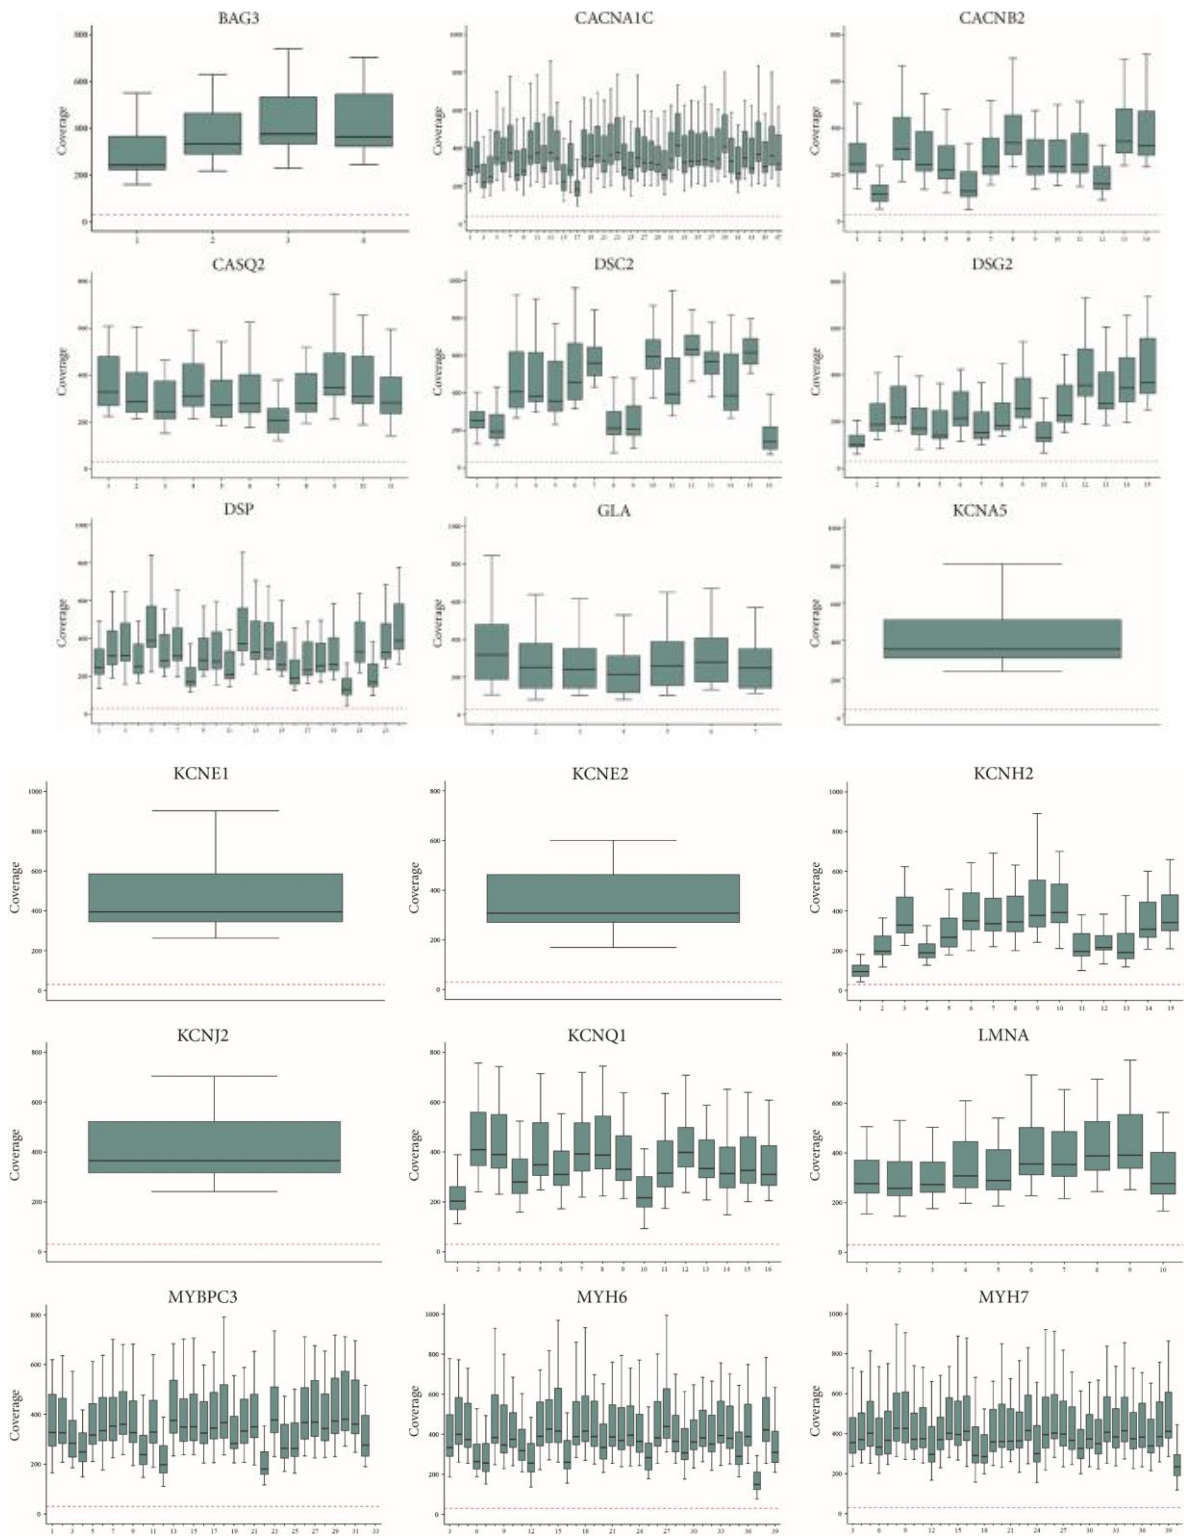

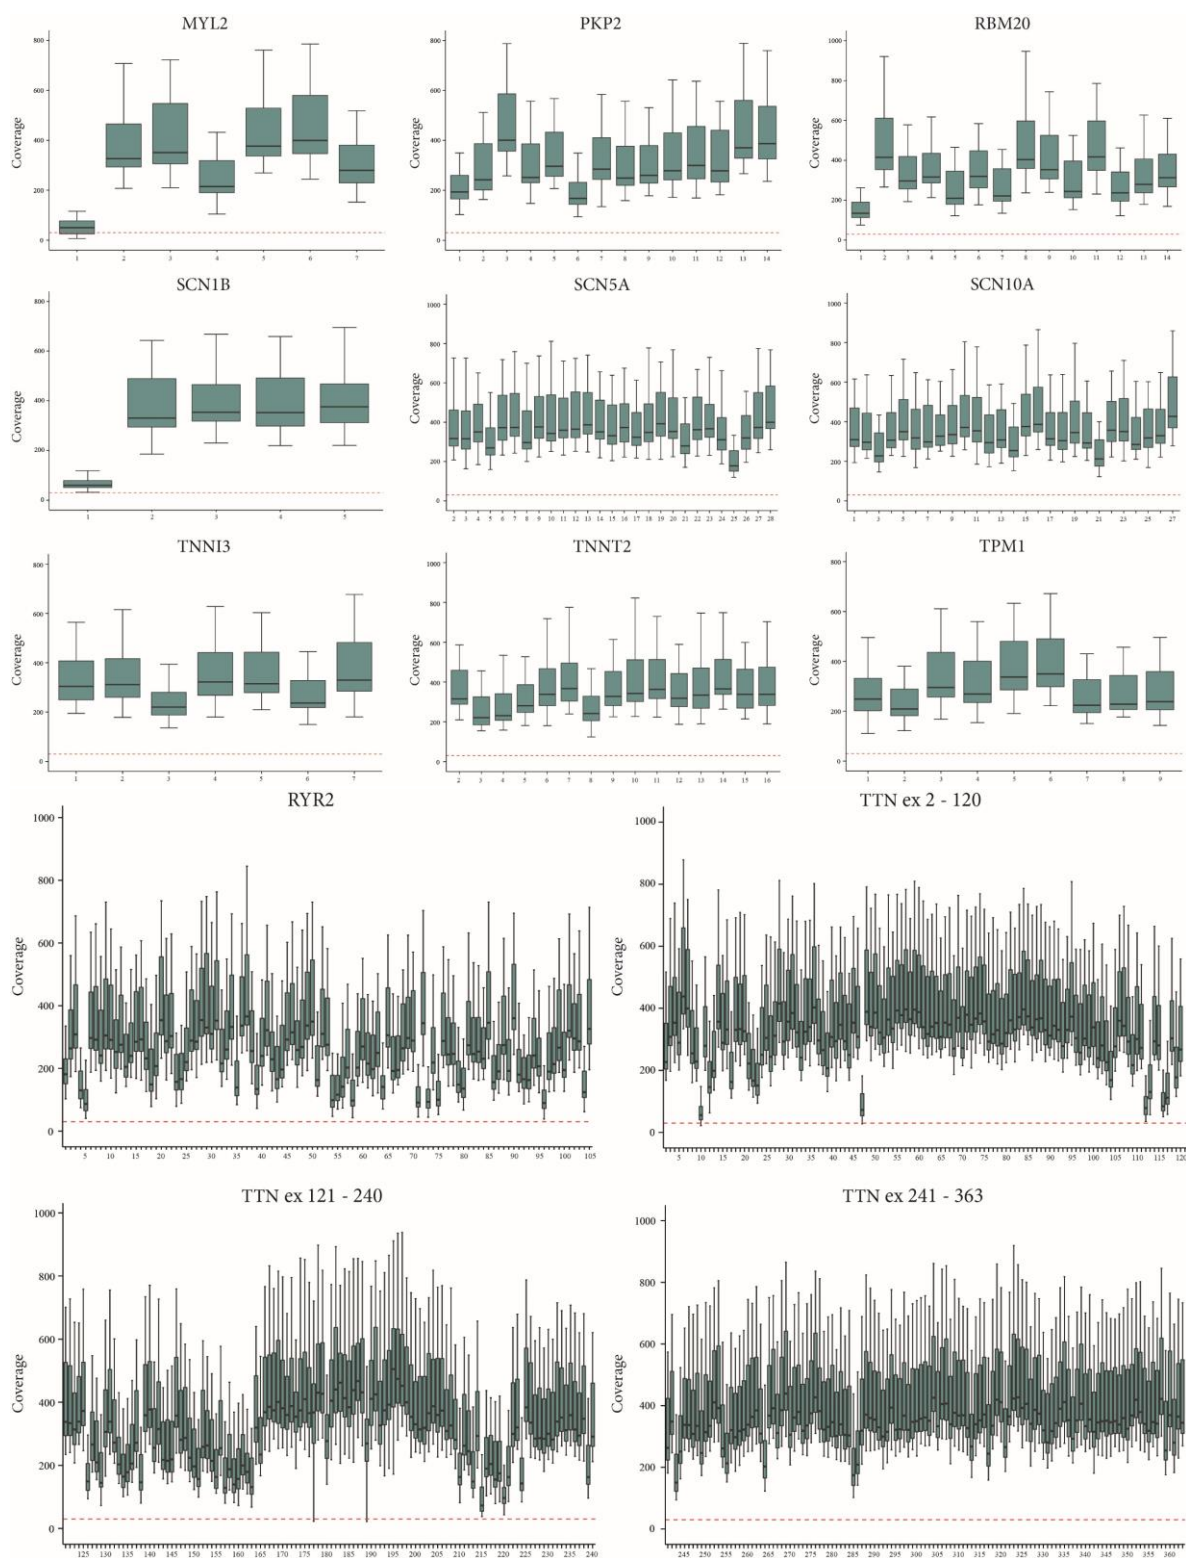

**Supplementary Figure S3:** Read-depth (coverage) of all exons for all genes from iteration three of the custom-cardiac panel. The dashed red line indicates the 30× read-depth threshold.

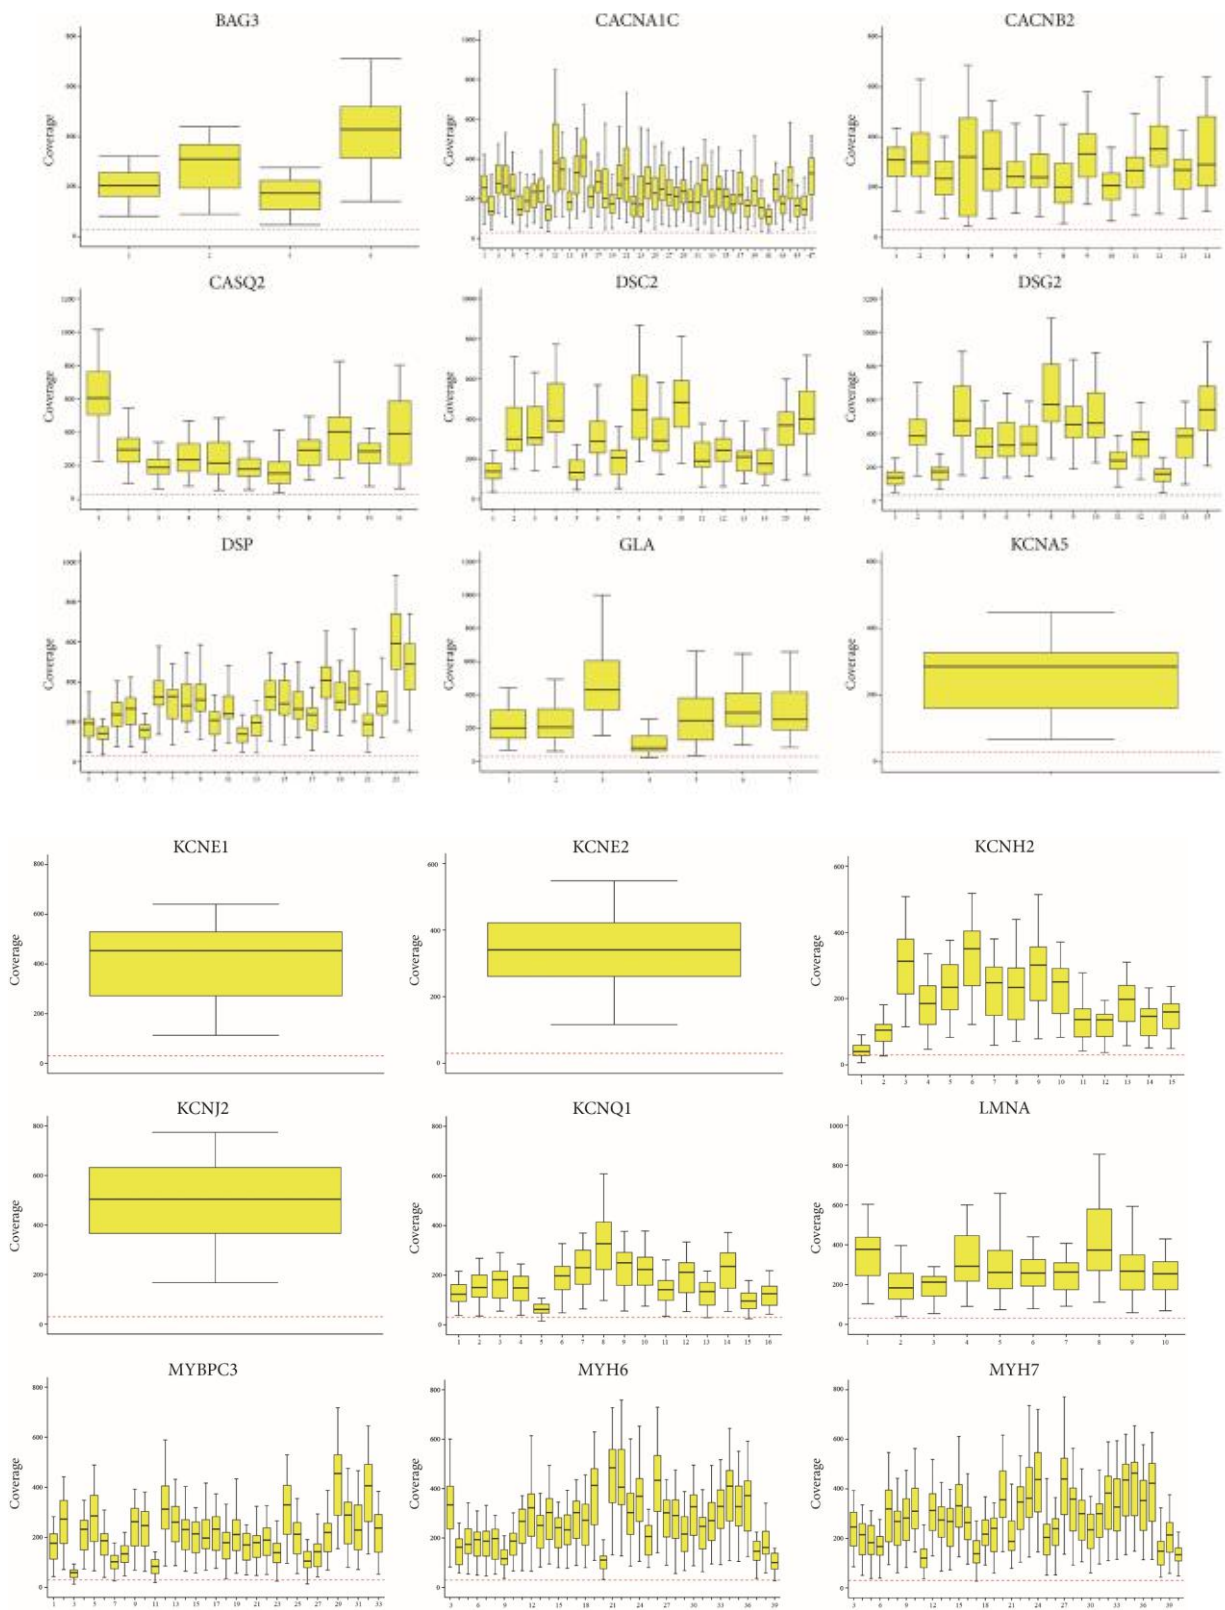

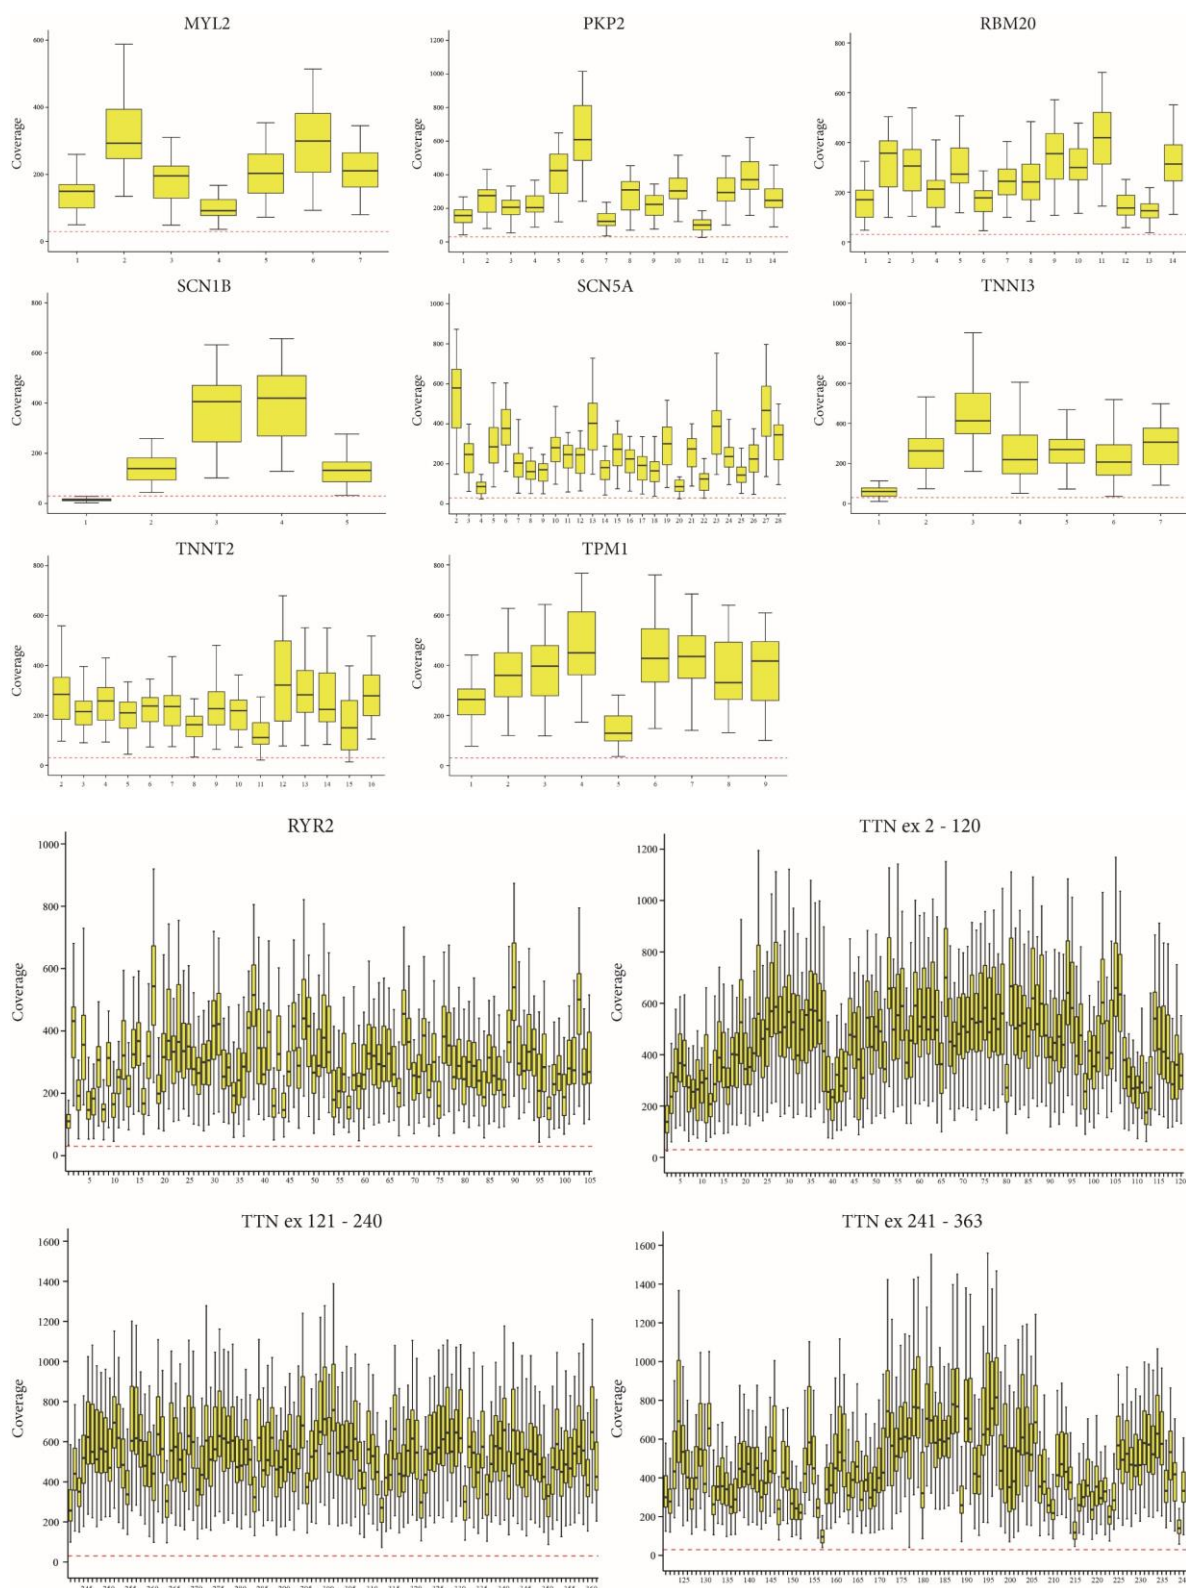

**Supplementary Figure S4:** Read-depth (coverage) of all exons for all genes that were analysed from the TruSight® Cardio panel. The dashed red line indicates the 30× read-depth threshold.
